# Supplementary material for: Neutral and anionic zinc compounds supported by a bis(imino)phenyl NCN ligand
Source: Royal Society of Chemistry journal article supplement (doi:10.1039/c8dt00149a), 2018-01-01
Supplement: c8dt00149a1.pdf [file c8dt00149a1.pdf]

## Supporting information

to the manuscript

# Neutral and anionic zinc compounds supported by a bis(imino)phenyl NCN ligand

by

Minh Tho Nguyen<sup>†</sup>, Bullat Gabidullin<sup>‡</sup>, Georgii Nikonov<sup>†\*</sup>

<sup>†</sup>Department of Chemistry, Brock University, 1812 Sir Isaac Brock Way, St. Catharines, Ontario  
L2S 3A1, Canada

<sup>‡</sup>X-ray Core Facility, Faculty of Science, University of Ottawa, 150 Louis Pasteur, Ottawa,  
Ontario K1N 6N5, Canada

### Table of contents

|                                            |     |
|--------------------------------------------|-----|
| I. General information.....                | S2  |
| II. NMR Characterization of compounds..... | S3  |
| 1. Compound 6 .....                        | S3  |
| 2. Compound 7 .....                        | S4  |
| 3. Compound 8 .....                        | S5  |
| 4. Compound 9 .....                        | S6  |
| III. Crystallographic data .....           | S8  |
| IV. Reference .....                        | S10 |

## I. General information

All experiments involving air and moisture – sensitive compounds were carried out under an atmosphere of dried and purified nitrogen gas using standard Schlenk line or glovebox technique. THF, diethyl ether, benzene, DCM were purified by distillation over potassium hydroxide/benzophenone. Toluene, hexane, were purified by using Grubbs-type solvent purification system. All solvents were stored under nitrogen atmosphere prior to use.  $^1\text{H}$ ,  $^2\text{H}$ ,  $^{13}\text{C}$ ,  $^{11}\text{B}$  spectra were recorded on Bruker DPX-300 and Avance III HD 400 MHz spectrometer. The chemical shifts are expressed in parts per million (ppm) with residual solvent signal as internal standard. The coupling constants (J) are reported in Hertz (Hz) and splitting patterns are indicated in singlet (s), doublet (d), triplet (t), quartet (q), multiplet (m), broad (b). Unless indicated, starting materials were obtained from commercial sources. Bis(amino)aryl NCN pincer compound 2,6-(2,6- $^i\text{Pr}_2\text{C}_6\text{H}_3\text{N}=\text{CH})\text{C}_6\text{H}_3\text{-1-Br}$  was prepared according to literature procedure<sup>[1]</sup>.

## II. NMR Characterization of compounds

### 1. Compound 6

$^1\text{H}$  NMR spectrum

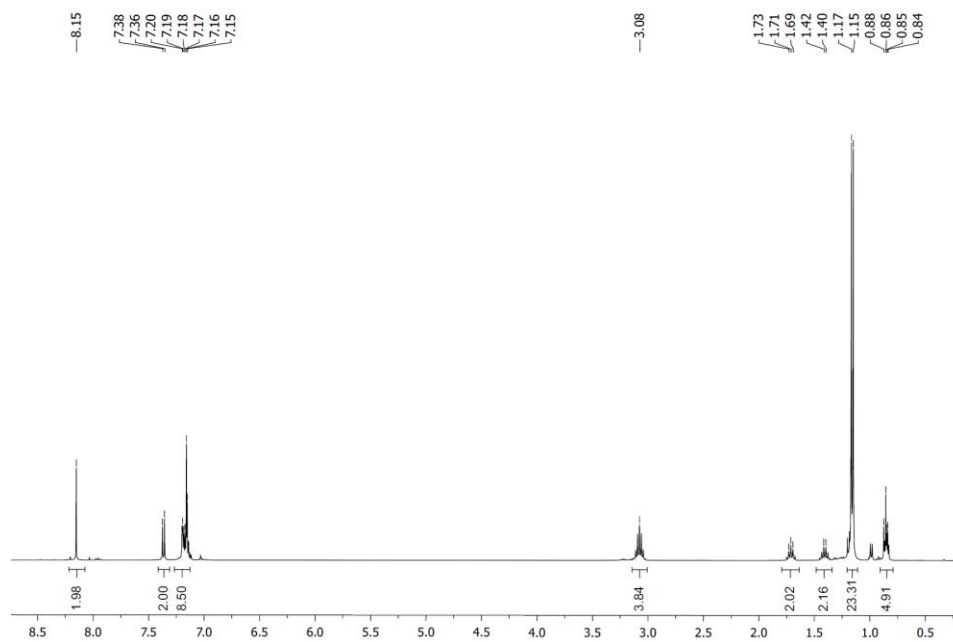

$^{13}\text{C}\{^1\text{H}\}$  NMR spectrum

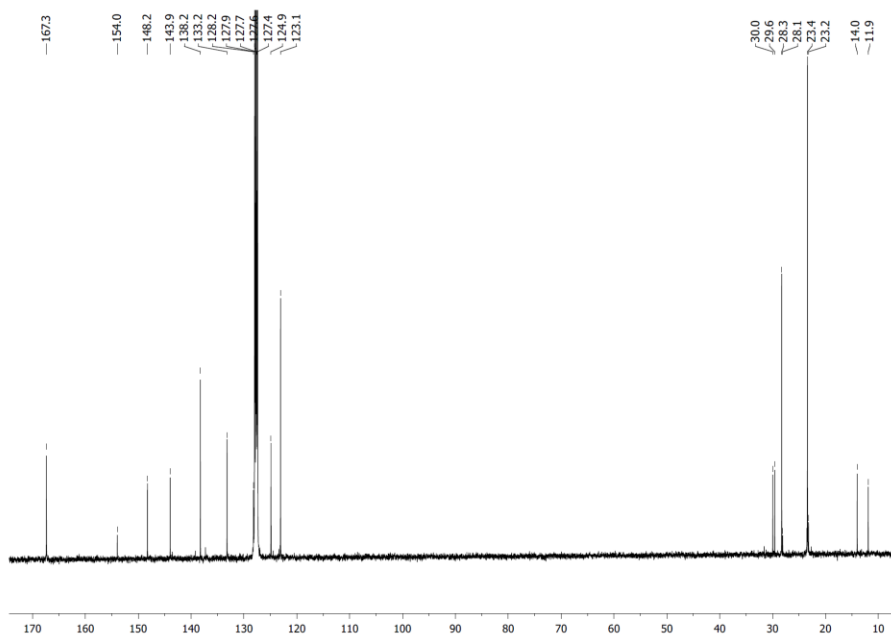

Figure S11.  $^1\text{H}$  and  $^{13}\text{C}\{^1\text{H}\}$  NMR spectra of **6**

**2. Compound 7**  
*<sup>1</sup>H NMR spectrum*

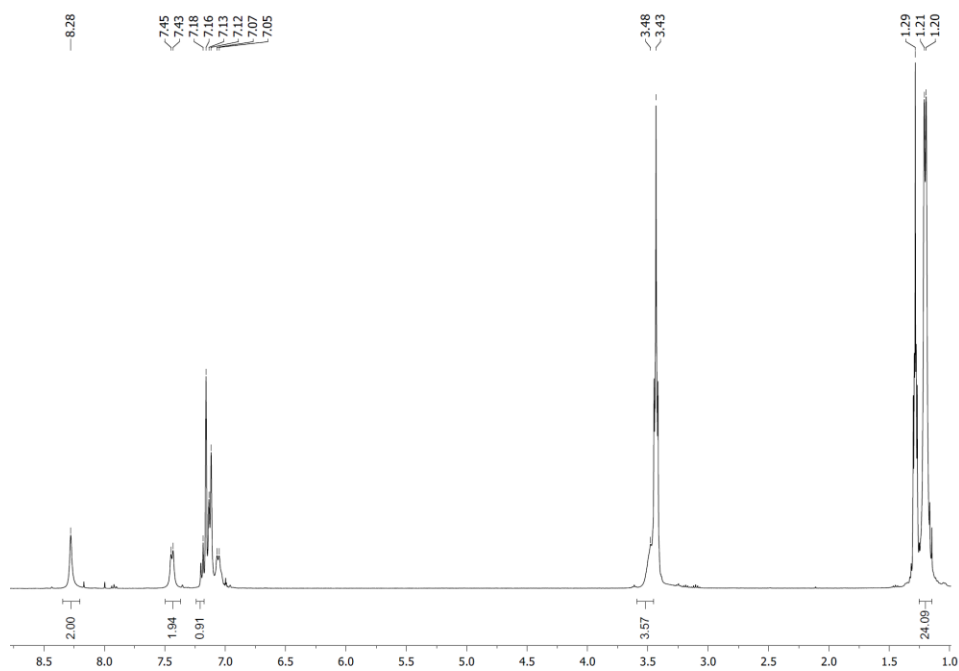

*<sup>13</sup>C{<sup>1</sup>H} NMR spectrum*

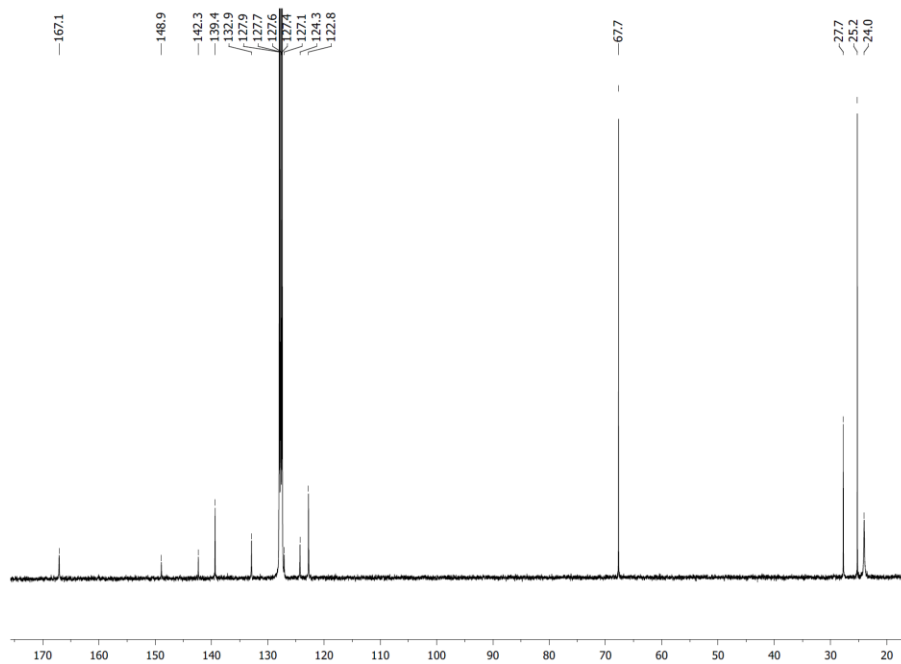

**Figure SI2.** <sup>1</sup>H and <sup>13</sup>C{<sup>1</sup>H} NMR spectra of **7**

### 3. Compound 8

$^1\text{H}$  NMR spectrum

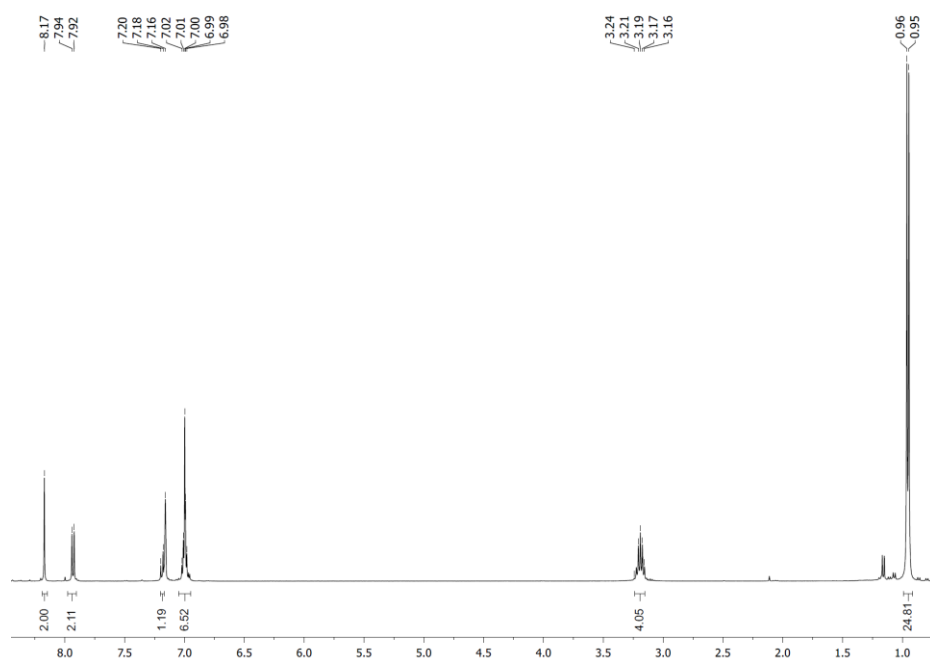

$^{13}\text{C}\{^1\text{H}\}$  NMR spectrum

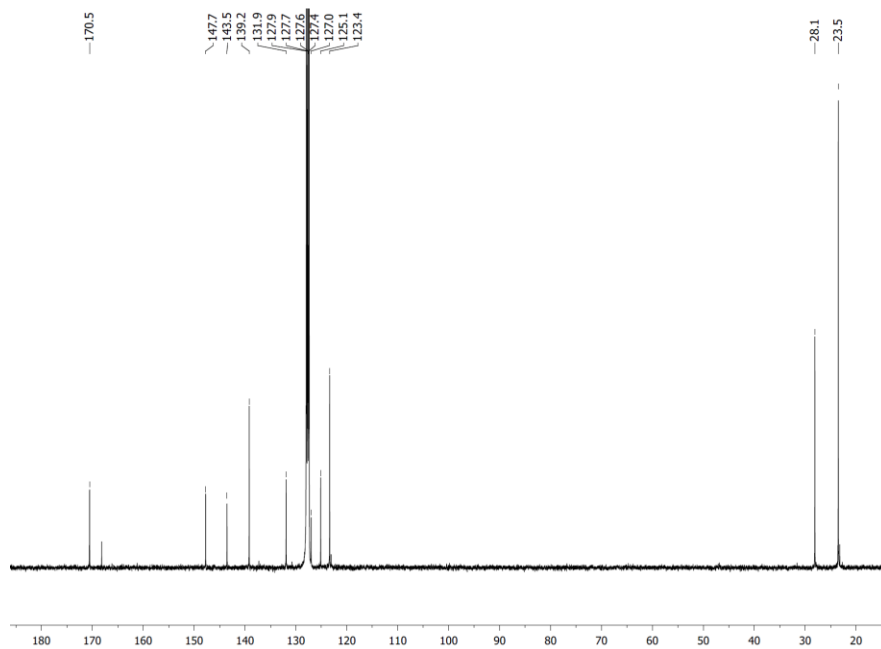

Figure SI3.  $^1\text{H}$  and  $^{13}\text{C}\{^1\text{H}\}$  NMR spectra of **8**

#### 4. Compound 9

##### $^1\text{H}$ NMR spectrum

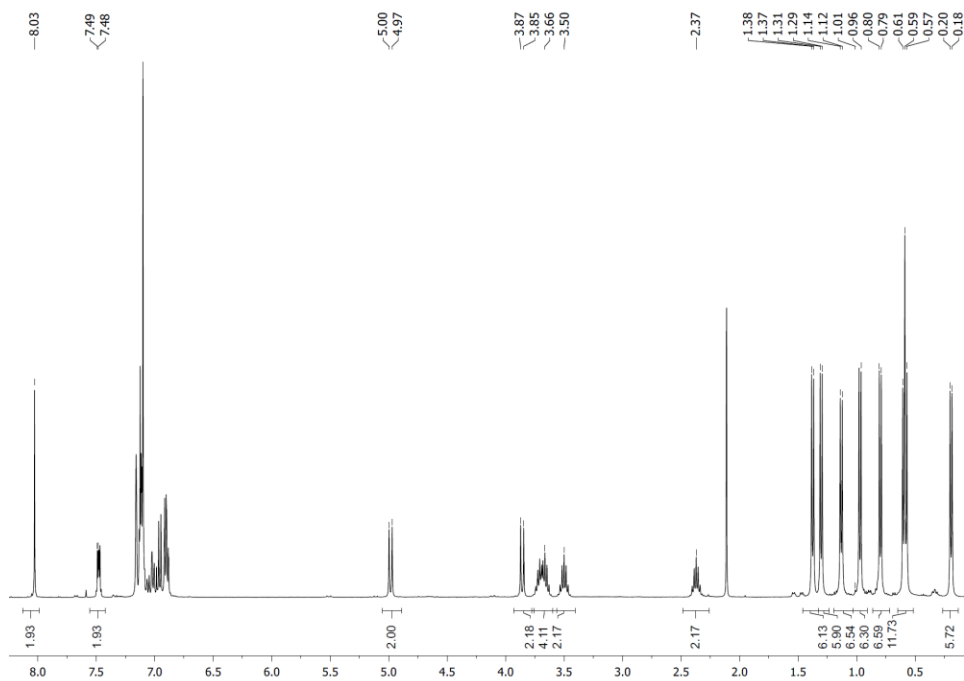

##### $^{13}\text{C}\{^1\text{H}\}$ NMR spectrum

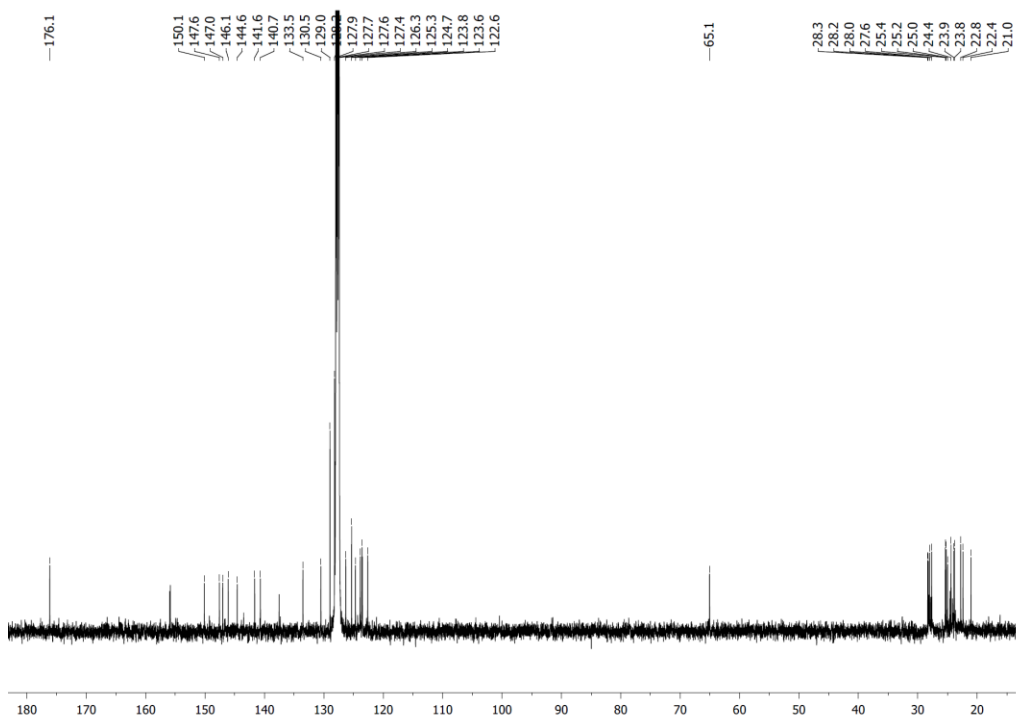

Figure SI4.  $^1\text{H}$  and  $^{13}\text{C}\{^1\text{H}\}$  NMR spectra of **9**

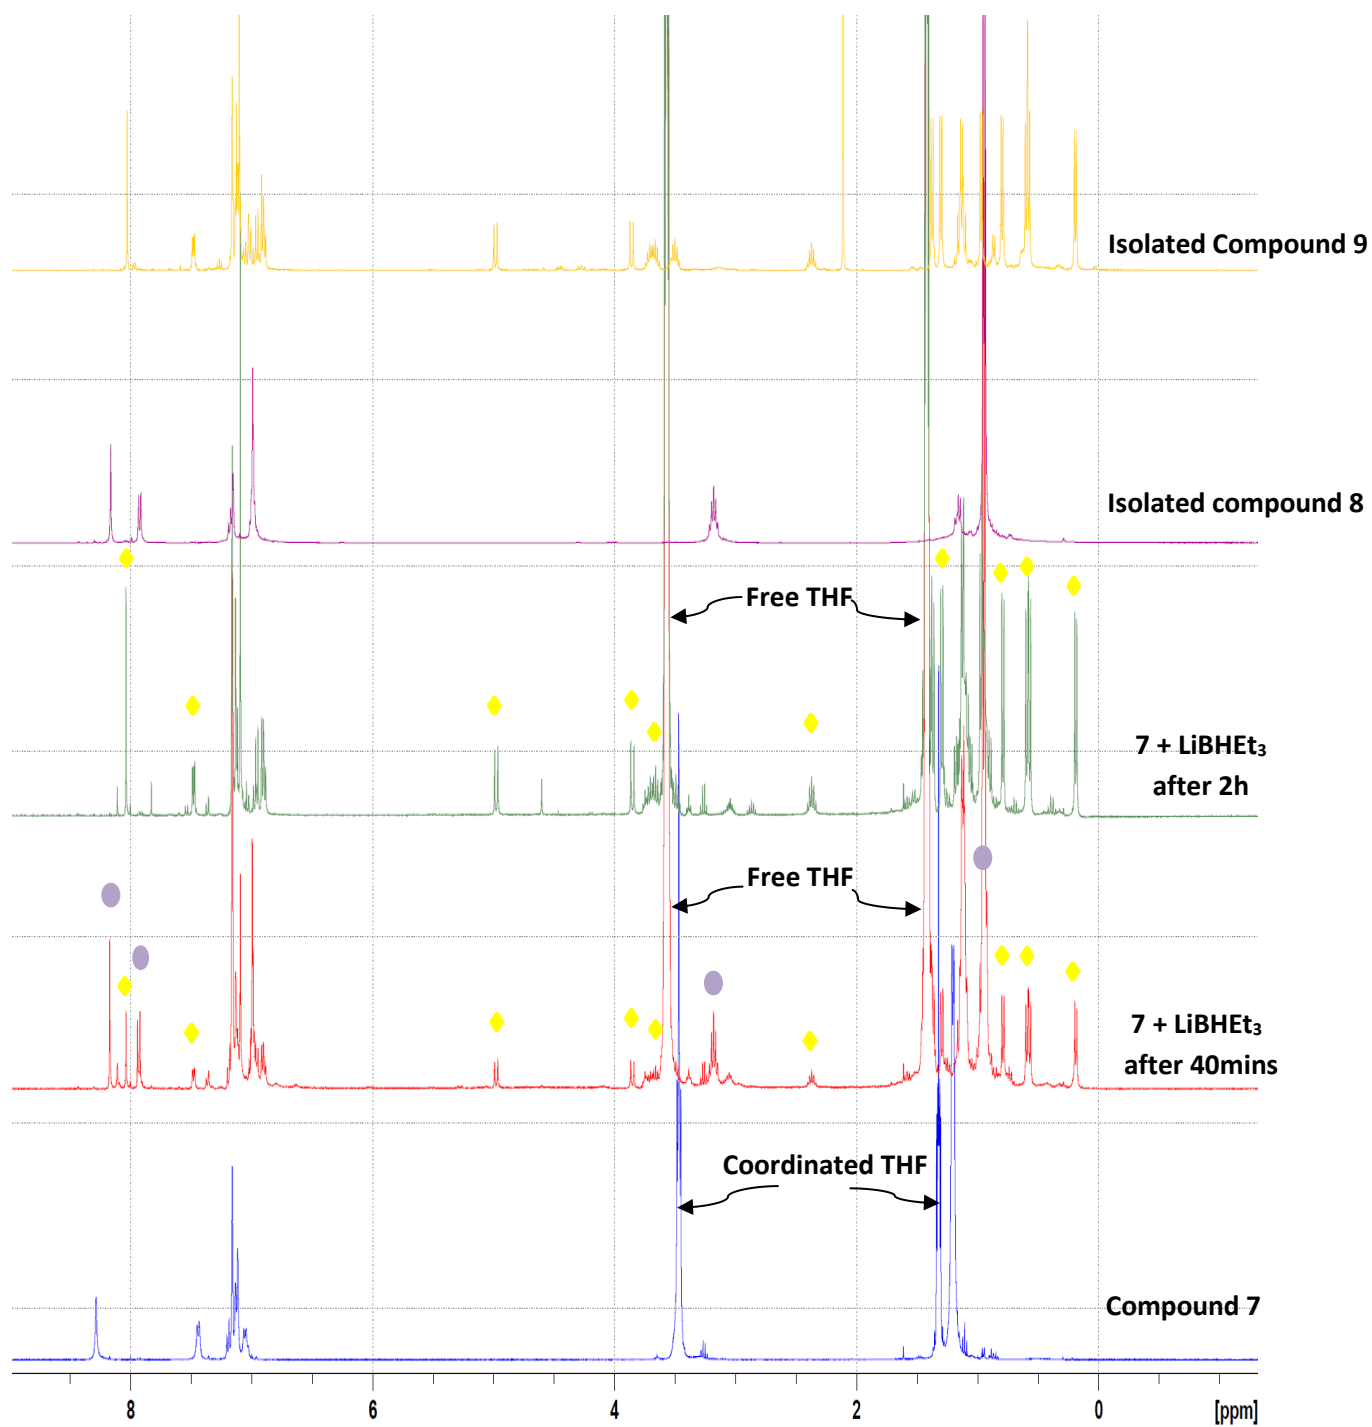

**Figure SI5.**  $^1\text{H}$  NMR spectrum of the reaction between **7** + (superhydride) LiBHET<sub>3</sub> at various time (yellow diamond corresponding to compound **9**, purple cycle corresponding to compound **8**).

### III. Crystallographic data

**Table S1** Crystal and structure refinement data for **6-9**.

|                                          | <b>6</b>                                          | <b>7</b>                                                             | <b>8</b>                                          | <b>9</b>                                                       |
|------------------------------------------|---------------------------------------------------|----------------------------------------------------------------------|---------------------------------------------------|----------------------------------------------------------------|
| Empirical formula                        | C <sub>26</sub> H <sub>48</sub> N <sub>4</sub> Zn | C <sub>48</sub> H <sub>69</sub> Cl <sub>2</sub> LiN <sub>2</sub> OZn | C <sub>64</sub> H <sub>78</sub> N <sub>4</sub> Zn | C <sub>64</sub> H <sub>80</sub> N <sub>4</sub> Zn <sub>2</sub> |
| Formula weight                           | 574.1                                             | 881.26                                                               | 968.67                                            | 1036.06                                                        |
| colour, habit                            | colorless, block                                  | colorless, block                                                     | colorless, block                                  | orange, block                                                  |
| Crystal size, mm <sup>3</sup>            | 0.16x0.31x0.84                                    | 0.75x0.74x0.50                                                       | 0.21x0.25x0.27                                    | 0.08x0.34x0.43                                                 |
| Crystal system                           | monoclinic                                        | orthorhombic                                                         | triclinic                                         | monoclinic                                                     |
| Space group                              | P2 <sub>1</sub> /n                                | Pnma                                                                 | P-1                                               | P2 <sub>1</sub> /c                                             |
| Unit cell dimensions:                    |                                                   |                                                                      |                                                   |                                                                |
| a, Å                                     | 9.555(3)                                          | 21.774(3)                                                            | 13.522(4)                                         | 21.465(2)                                                      |
| b, Å                                     | 23.515(9)                                         | 21.338(3)                                                            | 14.632(4)                                         | 15.5065(14)                                                    |
| c, Å                                     | 15.776(6)                                         | 10.5392(13)                                                          | 15.856(5)                                         | 19.1466(18)                                                    |
| α, °                                     | 90                                                | 90                                                                   | 77.163(4)                                         | 90                                                             |
| β, °                                     | 106.742(4)                                        | 90                                                                   | 86.790(4)                                         | 114.8170(10)                                                   |
| γ, °                                     | 90                                                | 90                                                                   | 67.573(4)                                         | 90                                                             |
| Volume, Å <sup>3</sup>                   | 3394(2)                                           | 4896.7(11)                                                           | 2826.0(15)                                        | 5784.3(9)                                                      |
| Z                                        | 4                                                 | 4                                                                    | 2                                                 | 4                                                              |
| Density (calcd), g/cm <sup>3</sup>       | 1.123                                             | 1.195                                                                | 1.138                                             | 1.190                                                          |
| Absorption coefficient, mm <sup>-1</sup> | 0.747                                             | 0.652                                                                | 0.476                                             | 0.870                                                          |
| F(000)                                   | 1232                                              | 1880                                                                 | 1040                                              | 2208                                                           |
| Temperature, K                           | 200(2)                                            | 200(2)                                                               | 238(2)                                            | 200(2)                                                         |



|                                                |                                                   |                                                   |                                                   |                                                   |
|------------------------------------------------|---------------------------------------------------|---------------------------------------------------|---------------------------------------------------|---------------------------------------------------|
| 2 $\theta$ range for data collection, °        | 2.19 to 28.28                                     | 1.87 to 28.38                                     | 1.77 to 27.00                                     | 1.68 to 28.32                                     |
| Reflections collected                          | 39832                                             | 81417                                             | 26044                                             | 69330                                             |
| Independent reflections                        | 8256 [R(int) = 0.0590]                            | 6269 [R(int) = 0.0590]                            | 12176 [R(int) = 0.0600]                           | 14211 [R(int) = 0.0594]                           |
| Data / restraints / parameters                 | 8256 / 91 / 391                                   | 6269 / 418 / 439                                  | 12176 / 0 / 622                                   | 14211 / 0 / 631                                   |
| Goodness-of-fit on F <sup>2</sup>              | 1.010                                             | 1.028                                             | 0.956                                             | 1.020                                             |
| Final R indices [I > 2 $\sigma$ (I)]           | R <sub>1</sub> = 0.0596, wR <sub>2</sub> = 0.1206 | R <sub>1</sub> = 0.0539, wR <sub>2</sub> = 0.1413 | R <sub>1</sub> = 0.0591, wR <sub>2</sub> = 0.1152 | R <sub>1</sub> = 0.0508, wR <sub>2</sub> = 0.1316 |
| R indices (all data)                           | R <sub>1</sub> = 0.1149, wR <sub>2</sub> = 0.1402 | R <sub>1</sub> = 0.0911, wR <sub>2</sub> = 0.1718 | R <sub>1</sub> = 0.1243, wR <sub>2</sub> = 0.1400 | R <sub>1</sub> = 0.1192, wR <sub>2</sub> = 0.1798 |
| Largest diff. peak and hole, e.Å <sup>-3</sup> | 0.563 and -0.699                                  | 0.477 and -0.655                                  | 0.291 and -0.442                                  | 1.595 and -1.270                                  |

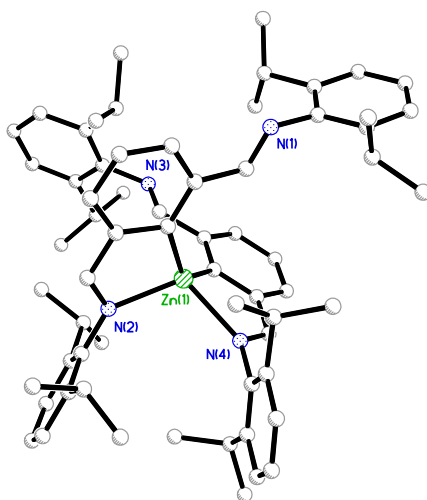

**Figure SI6.** Molecular structure of complex **8**

#### IV. Reference

- 1 S. Nüchel and P. Burger, *Organometallics*, 2000, **19**, 3305–3311.
